# Supplementary material for: A novel 1-D telluridoindate based on rare tetramer [In4Te10]4−unit with photocatalytic properties
Source: Royal Society of Chemistry journal article supplement (doi:10.1039/c2ce26537k), 2012-11-29
Supplement: c2ce26537k.pdf [file c2ce26537k.pdf]

## A novel 1-D Telluridoindate based on rare tetramer $[\text{In}_4\text{Te}_{10}]^{4-}$ unit with photocatalytic properties

Feilong Hu, Jian Zhou,\* Xing Liu, Rong Chen, Wensheng Fu, and Yuanchun Wei

Table S1 The selected bond lengths and angles of **1**.

|                       |             |                       |             |
|-----------------------|-------------|-----------------------|-------------|
| In(1)-Te(1)           | 2.7839(13)  | In(2)-Te(3)           | 2.7858(11)  |
| In(1)-Te(1)#1         | 2.7839(13)  | In(3)-N(2)            | 2.263(17)   |
| In(1)-Te(2)           | 2.7943(12)  | In(3)-N(1)            | 2.323(12)   |
| In(1)-Te(2)#2         | 2.7943(12)  | In(3)-N(1)#3          | 2.323(12)   |
| In(2)-Te(2)#2         | 2.7768(11)  | In(3)-Te(3)#3         | 2.7254(10)  |
| In(2)-Te(2)           | 2.7768(11)  | In(3)-Te(3)           | 2.7254(10)  |
| In(2)-Te(3)#2         | 2.7858(11)  |                       |             |
| Te(1)-In(1)-Te(1)#1   | 99.26(5)    | Te(2)#2-In(2)-Te(2)   | 99.91(5)    |
| Te(1)-In(1)-Te(2)     | 114.860(15) | Te(2)#2-In(2)-Te(3)#2 | 116.156(14) |
| Te(1)#1-In(1)-Te(2)   | 114.860(15) | Te(2)-In(2)-Te(3)#2   | 116.156(14) |
| Te(1)-In(1)-Te(2)#2   | 114.860(15) | Te(2)#2-In(2)-Te(3)   | 116.156(14) |
| Te(1)#1-In(1)-Te(2)#2 | 114.860(15) | Te(2)-In(2)-Te(3)     | 116.156(14) |
| Te(2)-In(1)-Te(2)#2   | 99.06(5)    | Te(3)#2-In(2)-Te(3)   | 93.51(5)    |
| N(2)-In(3)-N(1)       | 73.1(3)     | N(2)-In(3)-Te(3)      | 120.17(3)   |
| N(2)-In(3)-N(1)#3     | 73.1(3)     | N(1)-In(3)-Te(3)      | 98.41(15)   |
| N(1)-In(3)-N(1)#3     | 146.2(6)    | N(1)#3-In(3)-Te(3)    | 98.41(15)   |
| N(2)-In(3)-Te(3)#3    | 120.17(3)   | Te(3)#3-In(3)-Te(3)   | 119.66(5)   |
| N(1)-In(3)-Te(3)#3    | 98.41(15)   | N(1)#3-In(3)-Te(3)#3  | 98.41(15)   |

Symmetry transformations used to generate equivalent atoms: (#1)  $-x+1, -y+1, -z+1$ ;  
(#2)  $-x+1, -y+1, z$ ; (#3)  $-x, -y+1, z$ .

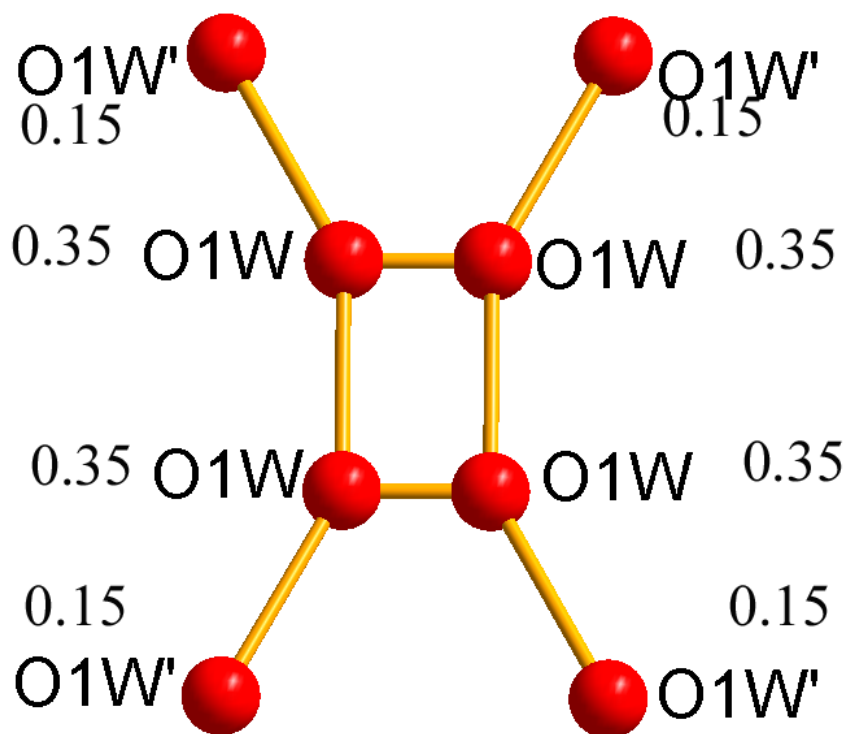

Figure S1 The disordered model of two O atoms with site occupation factors.

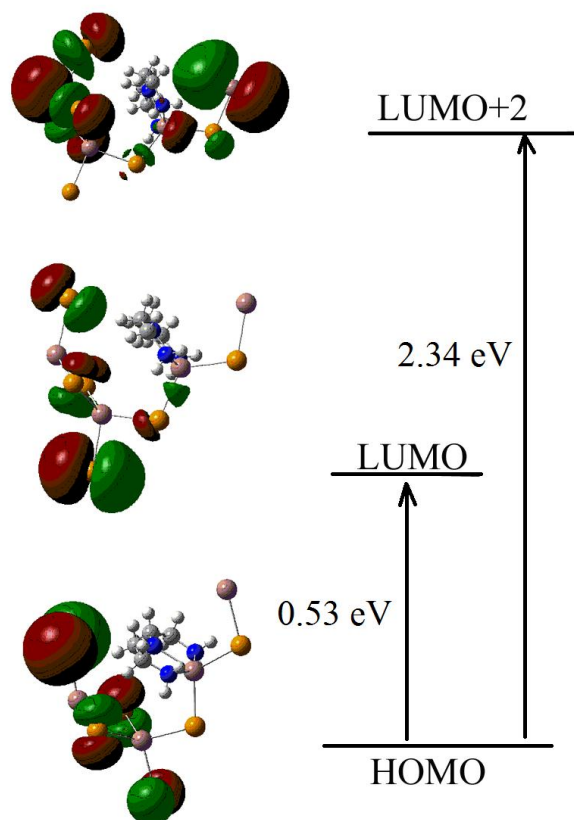

Figure S2 Calculated electronic band structure and the HOMO, LUMO and LUMO+2 population of the  $[\text{In}_3\text{Te}_5(\text{dien})]$  species.

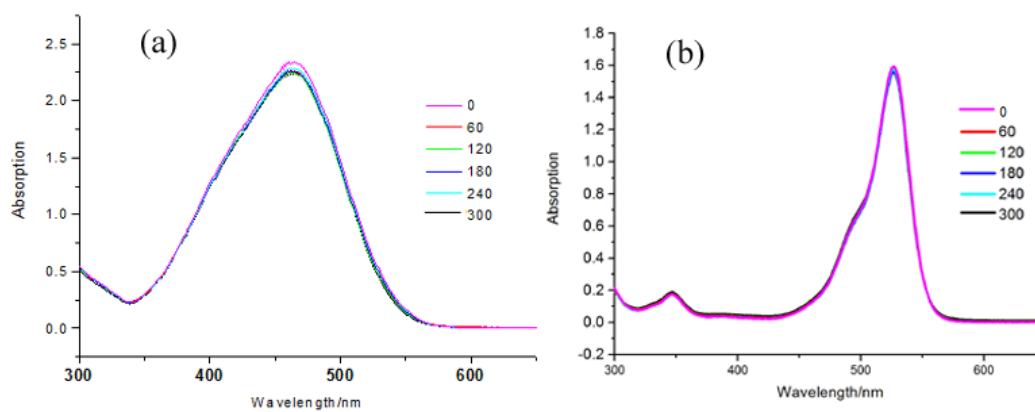

Figure S3 Absorption spectra of the solution of MO (a, 5mg/L, 100ml) and RhB (b, 5mg/L, 100ml) in the absence of **1** under exposure to UV light.

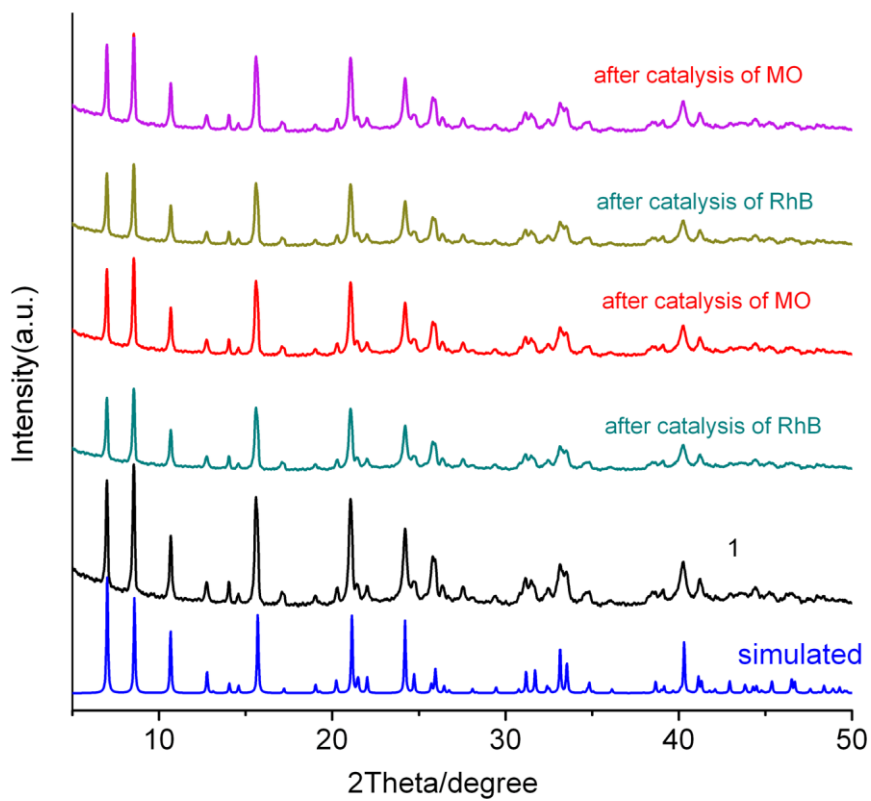

Figure S4. Simulated, experimental and after catalysis of RhB or Mo powder XRD patterns of 1.

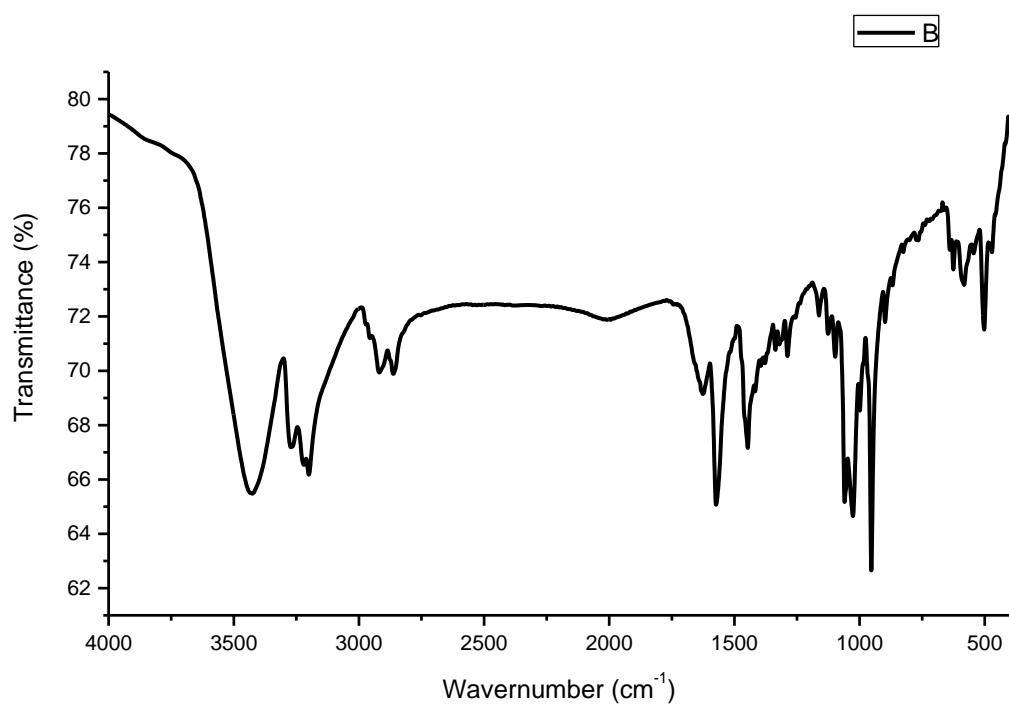

Figure S4 IR spectrum of 1.
